# Supplementary material
Source: Research Square preprint supplement (doi:10.21203/rs.3.rs-9361036/v1)
Supplement: Supplementary file 1 [file 4a63a3454c5b4c97eadcd460.docx]

**Table 6. Univariable analysis for ∆ VA predictors**

| **Predictor** | **Estimate** | **Std. Error** | **p-Value** | **95% CI (Low – High)** | **R²** |
| --- | --- | --- | --- | --- | --- |
| ***EZ disruption ratio*** | 0.011 | 0.064 | 0.864 | -0.118 – 0.140 | 0.001 |
| ***ELM disruption ratio*** | -0.033 | 0.083 | 0.698 | -0.200 – 0.134 | 0.003 |
| ***HRF*** | -963.08 | 437.80 | **0.032** | -1839.43 – -86.73 | 0.077 |
| ***CSFT*** | 0.013 | 0.009 | 0.156 | -0.005 – 0.032 | 0.034 |
| ***SRF*** | 3.524 | 2.643 | 0.188 | -1.767 – 8.815 | 0.030 |
| ***DRIL*** | 7.276 | 6.669 | 0.280 | -6.073 – 20.625 | 0.020 |
| ***DRSS*** | 0.101 | 0.084 | 0.233 | -0.067 – 0.270 | 0.024 |
| ***PD sup*** | 0.574 | 0.233 | **0.017** | 0.106 – 1.041 | 0.094 |
| ***PD Deep*** | 0.072 | 0.233 | 0.759 | -0.394 – 0.537 | 0.002 |
| ***VLD sup*** | 0.790 | 0.362 | **0.033** | 0.067 – 1.514 | 0.076 |
| ***VLD deep*** | 0.073 | 0.310 | 0.814 | -0.548 – 0.694 | 0.001 |
| ***FD sup*** | 32.159 | 15.555 | **0.043** | 1.022 – 63.296 | 0.069 |
| ***FD deep*** | 11.225 | 12.294 | 0.365 | -13.384 – 35.834 | 0.014 |
| ***Age*** | -0.159 | 0.156 | 0.311 | -0.471 – 0.153 | 0.018 |
| ***Gender (F)*** | 0.835 | 2.428 | 0.732 | -4.026 – 5.696 | 0.002 |
| ***DR Duration*** | -0.042 | 0.056 | 0.450 | -0.154 – 0.069 | 0.010 |
| ***Treatment arm*** | 4.269 | 2.365 | 0.076 | -0.465 – 9.004 | 0.053 |

VA: visual acuity; PD: perfusion density; sup: superficial; VLD: vessel length density; FD: fractal dimension; EZ: ellipsoid zone; ELM; external limiting membrane; HRF: hyperreflective foci; CSFT: central subfield thickness; DRSS: diabetic retinopathy severity score; DR: diabetic retinopathy.
