# Supplementary material
Source: Research Square preprint supplement (doi:10.21203/rs.3.rs-9361036/v1)
Supplement: Supplementary file 2 [file 7810ca9b2969023013610fd8.docx]

**Table 4. univariable analysis for final VA (week 52) predictors**

| **Predictor** | **Estimate** | **Std. Error** | **p-Value** | **95% CI (Low – High)** | **R²** |
| --- | --- | --- | --- | --- | --- |
| ***ELM disruption ratio*** | -0.255 | 0.080 | 0.002 | -0.415 – -0.095 | 0.150 |
| ***EZ disruption ratio*** | -0.188 | 0.062 | 0.004 | -0.312 – -0.063 | 0.136 |
| ***CSFT*** | -0.019 | 0.0095 | 0.044 | -0.038 – -0.001 | 0.068 |
| ***HRF*** | -835.41 | 459.01 | 0.074 | -1754.23 – 83.41 | 0.054 |
| ***SRF*** | 0.696 | 2.778 | 0.803 | -4.864 – 6.257 | 0.001 |
| ***DRIL*** | -0.638 | 6.976 | 0.927 | -14.603 – 13.327 | 0.000 |
| ***VLD sup*** | 0.870 | 0.372 | 0.023 | 0.125 – 1.616 | 0.086 |
| ***PD sup*** | 0.531 | 0.244 | 0.034 | 0.042 – 1.020 | 0.075 |
| ***FD sup*** | 30.73 | 16.20 | 0.063 | -1.69 – 63.16 | 0.058 |
| ***FD deep*** | 21.11 | 12.52 | 0.097 | -3.95 – 46.17 | 0.047 |
| ***VLD deep*** | 0.426 | 0.316 | 0.183 | -0.207 – 1.060 | 0.030 |
| ***PD Deep*** | 0.292 | 0.238 | 0.225 | -0.184 – 0.769 | 0.025 |
| ***Age*** | -0.269 | 0.159 | 0.095 | -0.587 – 0.049 | 0.047 |
| ***Treatment arm*** | 2.987 | 2.487 | 0.235 | -1.991 – 7.964 | 0.024 |
| ***DR Duration*** | -0.068 | 0.057 | 0.243 | -0.182 – 0.047 | 0.023 |
| ***Gender (F)*** | 2.717 | 2.492 | 0.280 | -2.271 – 7.705 | 0.020 |
| ***DRSS*** | 0.057 | 0.088 | 0.522 | -0.119 – 0.233 | 0.007 |

VA: visual acuity; PD: perfusion density; sup: superficial; VLD: vessel length density; FD: fractal dimension; EZ: ellipsoid zone; ELM; external limiting membrane; HRF: hyperreflective foci; CSFT: central subfield thickness; DRSS: diabetic retinopathy severity score; DR: diabetic retinopathy.
