# Supplementary material
Source: Research Square preprint supplement (doi:10.21203/rs.3.rs-9361036/v1)
Supplement: Supplementary file 3 [file 87e6e2b557afcb93657ae578.docx]

| **Variable** | **Mean ± SD** |
| --- | --- |
| Age (years) | 61.02 ± 7.76 |
| DR Duration (years) | 16.01 ± 21.76 |
| BL VA (letters) | 62.85 ± 8.73 |
| WK 52 VA (letters) | 75.38 ± 9.62 |
| **OCTA metrics** |  |
| PD sup (%) | 23.74 ± 4.97 |
| PD deep (%) | 25.21 ± 5.24 |
| VLD sup (%) | 12.40 ± 3.24 |
| VLD deep (%) | 15.13 ± 3.93 |
| FD sup (%) | 1.87 ± 0.08 |
| FD deep (%) | 1.84 ± 0.10 |
| **OCT metrics** |  |
| EZ disruption ratio (%) | 13.95 ± 18.92 |
| ELM disruption ratio (%) | 7.62 ± 14.59 |
| HRF(mm³) | 0.00126 ± 0.00267 |
| CSFT (µm) | 472.83 ± 128.66 |

**Table 1. Cohort descriptives**.

DR: diabetic retinopathy; VA: visual acuity; PD: perfusion density; sup: superficial; VLD: vessel length density; FD: fractal dimension; EZ: ellipsoid zone; ELM; external limiting membrane; HRF: hyperreflective foci; CSFT: central subfield thickness.
