# Supplementary material
Source: Research Square preprint supplement (doi:10.21203/rs.3.rs-9361036/v1)
Supplement: Supplementary file 4 [file a51de5dc14529d4cda614706.docx]

**Table 7. Multivariable analysis for ∆ VA predictors**

| **Predictors** | **Estimate** | **Std. Error** | **p-Value** | **95% CI (Low – High)** |
| --- | --- | --- | --- | --- |
| ***(Intercept)*** | 8.87 | 66.27 | 0.894 | -121.02 – 138.77 |
| ***HRF*** | -1131.82 | 250.64 | <0.001 | -1623.06 – -640.57 |
| ***PD/VLD sup combo*** | 2.99 | 3.11 | 0.341 | -3.11 – 9.08 |
| ***FD sup*** | 2.71 | 35.40 | 0.939 | -66.66 – 72.09 |

| **Metric / Predictor** | **Partial R²** |
| --- | --- |
| ***Full Model R²*** | **0.1901** |
| ***HRF*** | 0.1042 |
| ***PDVLD sup combo*** | 0.0226 |
| ***FD sup*** | 0.0001 |

**∆**VA: visual acuity change; HRF: hyperreflective foci; PD: perfusion density; sup: superficial; VLD: vessel length density; FD: fractal dimension.
