# Supplementary material
Source: Research Square preprint supplement (doi:10.21203/rs.3.rs-9361036/v1)
Supplement: Supplementary file 5 [file def156288480c4ebb347dad6.docx]

**Table 3. Multivariable analysis for baseline VA predictors**

| **Term** | **Estimate** | **Std. Error** | **p-Value** | **95% CI (Low –High)** |
| --- | --- | --- | --- | --- |
| ***(Intercept)*** | 76.98 | 4.53 | **<0.001** | 68.10 – 85.86 |
| ***CSFT*** | -0.026 | 0.010 | **0.014** | -0.046 – -0.006 |
| ***EZ disruption ratio*** | -0.108 | 0.128 | 0.403 | -0.359 – 0.143 |
| ***ELM disruption ratio*** | -0.051 | 0.130 | 0.695 | -0.307 – 0.204 |

| **Metric / Predictor** | **R² (or Effect)** |
| --- | --- |
| ***Full Model R²*** | **0.317** |
| ***CSFT – partial R²*** | 0.158 |
| ***EZ disruption ratio – partial R²*** | 0.030 |
| ***ELM disruption ratio – partial R²*** | 0.004 |

VA: visual acuity; EZ: ellipsoid zone; ELM; external limiting membrane; CSFT: central subfield thickness
