# Supplementary material
Source: Research Square preprint supplement (doi:10.21203/rs.3.rs-9361036/v1)
Supplement: Supplementary file 6 [file f522605d1dd60a446c818729.docx]

**Table 5. Multivariable analysis for final VA (week 52) predictors**

| **Term** | **Estimate** | **Std. Error** | **p-Value** | **95% CI (Low – High)** |
| --- | --- | --- | --- | --- |
| ***(Intercept)*** | 84.36 | 4.75 | <0.001 | 75.05 – 93.68 |
| ***EZ disruption ratio*** | -0.144 | 0.103 | 0.168 | -0.347 – 0.058 |
| ***CSFT*** | -0.022 | 0.011 | 0.045 | -0.043 – -0.001 |
| ***ELM disruption ratio*** | -0.018 | 0.117 | 0.877 | -0.248 – 0.212 |
| ***PDVLD sup combo*** | 2.377 | 1.007 | **0.022** | 0.404 – 4.351 |

| **Metric / predictor** | **Partial R²** |
| --- | --- |
| ***Full model* R²** | 0.277 |
| ***CSFT*** | 0.078 |
| ***PDVLD sup combo*** | 0.062 |
| ***EZ disruption ratio*** | 0.034 |
| ***ELM disruption ratio*** | 0.0003 |

VA: visual acuity; EZ: ellipsoid zone; ELM; external limiting membrane; CSFT: central subfield thickness; PD: perfusion density; sup: superficial; VLD: vessel length density.
