# Supplementary material
Source: Research Square preprint supplement (doi:10.21203/rs.3.rs-9361036/v1)
Supplement: Supplementary file 7 [file f7d0adc6a16985f9c83d1149.docx]

| **Predictor** | **Estimate** | **Std. Error** | **p-Value** | **95% CI (Low – High)** | **R²** |
| --- | --- | --- | --- | --- | --- |
| ***CSFT*** | -0.033 | 0.0078 | **<0.001** | -0.049 – -0.017 | 0.235 |
| ***EZ disruption ratio*** | -0.199 | 0.0547 | **<0.001** | -0.308 – -0.089 | 0.185 |
| ***ELM disruption ratio*** | -0.222 | 0.0730 | **0.003** | -0.368 – -0.076 | 0.138 |
| ***DRIL*** | -7.914 | 6.249 | 0.210 | -20.422 – 4.595 | 0.027 |
| ***SRF*** | -2.828 | 2.496 | 0.262 | -7.824 – 2.169 | 0.022 |
| ***HRF*** | 127.669 | 428.174 | 0.767 | -729.413 – 984.752 | 0.002 |
| ***VLD sup*** | 0.080 | 0.354 | 0.822 | -0.628 – 0.788 | 0.001 |
| ***PD sup*** | -0.043 | 0.231 | 0.854 | -0.504 – 0.419 | 0.001 |
| ***FD sup*** | -1.424 | 15.155 | 0.925 | -31.760 – 28.912 | 0.000 |
| ***PD Deep*** | 0.220 | 0.217 | 0.314 | -0.214 – 0.655 | 0.017 |
| ***FD deep*** | 9.887 | 11.570 | 0.396 | -13.273 – 33.048 | 0.012 |
| ***VLD deep*** | 0.353 | 0.288 | 0.226 | -0.224 – 0.930 | 0.025 |
| ***Gender (F)*** | 1.882 | 2.272 | 0.411 | -2.666 – 6.431 | 0.012 |
| ***Age*** | -0.110 | 0.147 | 0.457 | -0.405 – 0.184 | 0.010 |
| ***Treatment arm*** | -1.283 | 2.279 | 0.576 | -5.846 – 3.280 | 0.005 |
| ***DRSS*** | -0.045 | 0.080 | 0.579 | -0.204 – 0.115 | 0.005 |
| ***DR Duration*** | -0.025 | 0.053 | 0.633 | -0.131 – 0.080 | 0.004 |

**Table 2. univariable analysis for baseline VA predictors**

VA: visual acuity; PD: perfusion density; sup: superficial; VLD: vessel length density; FD: fractal dimension; EZ: ellipsoid zone; ELM; external limiting membrane; HRF: hyperreflective foci; CSFT: central subfield thickness; DRSS: diabetic retinopathy severity score; DR: diabetic retinopathy.
